# Evaluating brain parcellations using the distance controlled boundary coefficient

Da Zhi<sup>a,b</sup>, Maedbh King<sup>d</sup>, Jörn Diedrichsen<sup>a,b,c,\*</sup>

<sup>a</sup>*Brain and Mind Institute, Western University, London, Ontario, Canada*

<sup>b</sup>*Department of Computer Science, Western University, London, Ontario, Canada*

<sup>c</sup>*Department of Statistical and Actuarial Sciences, Western University, London, Ontario, Canada*

<sup>d</sup>*Department of Psychology, University of California, Berkeley, CA, U.S.A*

---

## Abstract

An important goal of human brain mapping is to define a set of distinct regions that can be linked to unique functions. Numerous brain parcellations have been proposed, using cytoarchitectonic data, structural or functional Magnetic Resonance Imaging (fMRI). The intrinsic smoothness of the brain data, however, poses a problem for current methods seeking to compare different parcellations to each other. For example, criteria that simply compare within-parcel to between-parcel similarity provide even random parcellations with a high value. Furthermore, the evaluation is biased by the spatial scale of the parcellation. To address this problem, we propose the Distance Controlled Boundary Coefficient (DCBC), an unbiased criterion to evaluate discrete parcellations. We employ this new criterion to evaluate whether existing parcellations of the human neocortex can predict functional boundaries on a rich multi-domain task battery. We find that common anatomical parcellations do not perform better than chance, suggesting that task-based functional boundaries do not align well with sulcal landmarks. Parcellations based on resting-state fMRI data perform well; in some cases, as well as a parcellation defined on the evaluation data itself. Finally, multi-modal parcellations that combine functional and anatomical criteria perform substantially worse than those based on functional data alone, indicating that functionally homogeneous regions often span major anatomical landmarks. Overall, the DCBC advances the field of functional brain mapping by providing an unbiased metric that compares the predictive ability of different brain parcellations to define functionally and anatomically homogeneous brain regions.

*Keywords:* Task-evoked functional MRI, brain parcellation, parcellation evaluation criterion, resting-state connectivity

---

---

\*Corresponding author. Brain and Mind Institute, Western University, 1151 Richmond St. N., N6A 5B7, London, ON, Canada.

*Email address:* [jdiedric@uwo.ca](mailto:jdiedric@uwo.ca) (Jörn Diedrichsen)

## 1. Introduction

There is a long history in neuroscience of subdividing the human brain into different regions based on differences in histology (Brodmann, 1909). It is commonly understood that brain function arises from the interactions between sub-regions that are structurally and/or functionally distinct (Felleman and Van Essen, 1991, Eickhoff et al., 2018), While early parcellations of the human brain were based on the cytoarchitectonic organisation of the neocortex (Brodmann, 1909, Zilles et al., 2002, Talairach, 1988), the advent of neuroimaging allowed an in-vivo assessment of brain organisation. In recent years, many parcellations based on task-evoked and resting functional magnetic imaging resonance (fMRI) data have been published, along with multi-modal parcellations that also incorporate structural and cytoarchitectonic information (Glasser and Van Essen, 2011, Yeo et al., 2011, Power et al., 2011, Bellec et al., 2010).

In the study of brain function, parcellations play an important practical role. They are commonly used to define the regions of interest (ROIs) to summarize functional and anatomical data, or to define the nodes for subsequent connectivity analysis (Sporns, 2011). The main function of parcellation is to reduce complexity of the statistical analysis, as the brain-wide data can be summarized with a smaller number of values, each reflecting measurements from a region with high homogeneity. Additionally, widely-accepted parcellation maps aid the direct comparison between studies (Arslan et al., 2018).

Despite the importance of brain parcellations in human neuroscience research, there is no commonly accepted evaluation criterion to compare different parcellations. The obvious reason for this is that different parcellations are generated with different goals in mind. Specially, some parcellations aim to define regions that have a common anatomical characteristic (Desikan et al., 2006, Fischl et al., 2004), a shared connectivity fingerprint (Yeo et al., 2011, Gordon et al., 2016, Power et al., 2011), or a homogeneous task-activation profile (Yeo et al., 2015). As such, brain parcellations can be evaluated based on different types of data (Arslan et al., 2018).

Universally, however, any parcellation should aim to define regions such that the functional profiles (whether anatomical measures, connectivity patterns, or task activation) of two brain locations in the same region should be maximally similar to each other, whereas

two brain locations in different regions should be maximally different. Thus, brain parcellation can be viewed as a clustering problem. As a result, standard machine learning methods to evaluate clustering solutions, have been applied to brain parcellation. Two such examples are the measure of global Homogeneity (Gordon et al., 2016, Craddock et al., 2012) and the  
35 Silhouette coefficient (Rousseeuw, 1987).

However, these two evaluation criteria have the common problem, in that they do not account for the spatial nature of the underlying data. In the case of the human neocortex, the functional correlation between two nodes on the cortical surface depends on their distance, with nearby nodes showing a higher similarity compared to far away ones. This leads to the  
40 fact that even random, but spatially contiguous, parcellations can achieve a relatively high global Homogeneity or Silhouette coefficient. To establish whether a parcellation identifies any real functional boundaries at all, Monte-Carlo simulations using random parcellations are therefore necessary (Arslan et al., 2018). To complicate matters further, both global Homogeneity and Silhouette coefficients tend to be higher for finer parcellations. This makes  
45 it difficult to compare between two parcellations with different spatial resolutions.

In this paper, we address this problem by proposing a novel evaluation criterion, the Distance-Controlled Boundaries Coefficient (DCBC). As the Silhouette coefficient, it compares within-parcel and between-parcel correlations of the functional profiles. However, the DCBC takes into account the spatial smoothness of the data by only comparing pairs of  
50 locations with the same distance on the cortical surface. As we will show, the expected value of the DCBC for a random parcellation is zero. Thus, no simulations with random parcellations are necessary to establish a baseline measurement; we can directly test the DCBC against zero. We also show that this baseline value is invariant to the number of parcels in the random parcellation. This enables us to use the DCBC to directly compare parcellations  
55 of different spatial scales.

We then use the DCBC to evaluate a set of common parcellations of the human neocortex (Yeo et al., 2011, 2015, Gordon et al., 2016, Power et al., 2011, Glasser et al., 2016, Schaefer et al., 2018, Fan et al., 2016, Baldassano et al., 2015, Shen et al., 2013, Arslan and Rueckert, 2015, Tzourio-Mazoyer et al., 2002, Desikan et al., 2006, Fischl et al., 2004). We performed  
60 this evaluation based on task-based fMRI data, specifically on the comprehensive Multi-

Domain Task Battery (MDTB) (King et al., 2019), which contains functional contrasts across many cognitive domains measured in the same participants. In contrast to previous evaluations on functional resting state data (Arslan et al., 2018, Eickhoff et al., 2018), the use of task-based data enables an evaluation of functional boundaries that are stable across  
65 a wide range of mental states. A python toolbox for the efficient computation of the DCBC, as well as a surface-based version of the MDTB data set are publicly available to download.

## 2. Methods

### 2.1. Overview

The DCBC compares the correlation between two brain locations within a parcel to the  
70 correlation between two brain locations across a boundary between parcels. Importantly, this comparison is only performed for pairs of brain locations that are separated by the same spatial distance. The calculation of the DCBC proceeds in four steps. First, we require a data set that provides a rich characterization of each brain location. This data set defines the *functional profile* for each brain location. While the DCBC can be applied to any  
75 high-dimensional data set, such as multi-modal anatomical data or connectivity fingerprints based on resting-state fMRI, we focus here on the MDTB data set (King et al., 2019), which provides 34 activity estimates across a range of motor, cognitive and social tasks. Secondly, we require a measure of spatial distance between two brain locations, either defined on the cortical surface, or for subcortical structures, in the volume. Based on these distances, all  
80 location pairs are subdivided into a set of spatial bins. The within-parcel and between-parcel correlation is then computed for each spatial bin separately. In the last step, the results are integrated across spatial bins, using an adaptive weighting scheme. To validate the method, we employed random parcellations of the human neocortex using a range of spatial resolutions, as well as sets of smooth artificial functional data sets.

### 85 2.2. MDTB dataset

To define the functional profiles for the evaluation, we are using the publicly available MDTB data set (King et al., 2019), which contains a wide range of tasks, quantifying processes required for motor, cognitive, and social function. Each of the 24 participants (16

females, 8 males, mean age=23.8) was scanned four times for 80-minutes, while performing  
90 either task set A or B (17 tasks for each, 9 tasks in common). Task set A was performed in  
the first two sessions, task set B in the last two sessions. A total of approximately 5.3 h of  
functional data per participant was collected.

In each imaging run, every task was performed once for a 35 s block, starting with  
a 5 s instruction period, followed by a 30 s period of continuous task performance. The  
95 task battery included motor (finger tapping, sequence production), working memory (2-back  
task, math), language (verb generation, reading), social (theory of mind, action observa-  
tion), executive control (no-go, stroop), attention (visual search), emotion (facial expression,  
pleasant/ unpleasant pictures), spatial (mental rotations), introspection tasks (spatial and  
motor imagery), movie-based tasks (cartoon, nature, landscapes), and rest (fixation) (King  
100 et al., 2019).

All fMRI data were acquired on a 3T Siemens Prisma at Western University. The imaging  
parameters were as follows: repetition time = 1 s; field-of-view = 20.8 cm; phase encoding  
direction P to A; 48 slices; 3 mm thickness; in-plane resolution  $2.5 \times 2.5 \text{ mm}^2$ . For anatomical  
localization and normalization, a 5 min high-resolution scan of the whole brain was acquired  
105 (see (King et al., 2019) for more details).

Data pre-processing was carried out using tools from SPM12 ([www.fil.ion.ucl.ac.uk/spm/doc/spm12\\_manual.pdf](http://www.fil.ion.ucl.ac.uk/spm/doc/spm12_manual.pdf)), as well as custom-written scripts written in MATLAB. For all  
participants, an anatomical image (T1-weighted MPRAGE, 1mm isotropic resolution) was  
acquired in the first scanning session. Functional data were realigned for head motion within  
110 each session, and for different head positions across sessions using the six-parameter rigid  
body transformation. The mean functional image was then co-registered to the anatomical  
image and this transformation was applied to all functional images. No smoothing or group  
normalization was applied.

### *2.3. Cortical re-construction and functional profiles*

115 The anatomical image of each of the 24 subjects was processed by standard recon-all  
pipeline of the freesurfer software (version 5.0) (Fischl, 2012), including brain extraction,  
white and pial surfaces generation, inflation, and spherical alignment to the new symmetric

fsLR-32K template (Van Essen et al., 2012). Individual surfaces were then re-sampled into this standard grid. This resampling led to surfaces with 32,492 vertices that are shared both  
120 across participants and across left and right hemisphere.

A General Linear Model (GLM) was fitted to the time series data of each voxel for each imaging run. Each task was modeled as a 30s regressor and all the preceding 5s instructions were modeled as separate regressors. The regression weights (betas) were estimated for each run independently and then averaged across the 16 runs for each task set.

125 To combine the activity estimates across the two task sets, we used the mean of the shared tasks as a common reference point. We subtracted this pattern from the average beta estimates for each task set separately, and then concatenated the two vectors of activity estimates. The average beta weights were then divided by the square root of the average mean-square-residual from the first-level GLM to obtain z-scores for each voxel. This resulted  
130 in functional profiles consisting of 34 pre-whitened activity estimates (set A = 17; set B = 17) for each voxel. Finally, we subtracted the overall mean across all tasks from the functional profile of each voxel.

The functional profiles were then mapped to each individual cortical surface by averaging the value from voxels along the connecting line between the pial and white-gray matter  
135 surface, using 5 equally spaced locations between the two surfaces.

#### *2.4. Existing evaluation criteria for brain parcellations*

Given that brain parcellation can be viewed as a clustering problem, two common methods used to evaluate the resultant parcels is the global Homogeneity (Craddock et al., 2012, Gordon et al., 2016), and the Silhouette coefficient (Rousseeuw, 1987). Homogeneity is de-  
140 fined as the average similarity across all pairs of vertices within a parcel. As the similarity measure of two vertices, we used the Pearson's correlation between functional profiles. The global Homogeneity is then simply the average with-parcel correlation across all parcels, with higher homogeneity suggesting a better parcellation.

Another popular metric for evaluation brain parcellation is the Silhouette coefficient  
145 (Rousseeuw, 1987), which compares the average dissimilarity (defined as  $1-R$ , where  $R$  represents Pearson's correlation between functional profiles) from one vertex to all other vertices

in the same parcel ( $w_i$ ), to the average dissimilarity from the same vertex to all the vertices that assigned to neighbouring parcels ( $b_i$ ) (Yeo et al., 2011, Arslan et al., 2018). For a cortical vertex  $v_i$ , the Silhouette coefficient is defined as:

$$S_i = \frac{b_i - w_i}{\max(w_i, b_i)}$$

150 where  $w_i$  and  $b_i$  represents the averaged within- and between-parcel dissimilarity of vertex  $v_i$ . By given a parcellation  $\{P_1, P_2, \dots, P_k\}$ ,  $w_i$  and  $b_i$  can be defined as:

$$w_i = \frac{1}{m_k - 1} \sum_{j \in P_k, i \neq j} 1 - R(v_i, v_j),$$
$$b_i = \frac{1}{N} \sum_{j \in nb(P_k)} 1 - R(v_i, v_j).$$

where  $m_k$  indicates the number of vertices that within the parcel  $P_k$ .  $N$  is the total number of vertices in all neighbouring parcels and  $nb(P_k)$  represents all neighbouring parcels of  $P_k$ . Based on this definition, the Silhouette coefficient for each vertex ranges from -1 to 1, 1 indicates that there is a perfect correlation within each parcel ( $r = 1$ ) and on average, not correlations across parcels ( $r = 0$ ).  
155

As we will see, both of these measures are biased by the intrinsic smoothness of the functional profiles on the cortical surface.

### 2.5. Measuring spatial distance

160 To account for the intrinsic smoothness of the data, we require a measure of spatial distance between any pair of brain locations. For subcortical structures, we have used the Euclidean distance between pairs of voxels (King et al., 2019). For the neocortex, however, we ideally would like to use the geodesic distance between vertices on the cortical surface. As an approximation to this distance, we used Dijkstra's algorithm (Dijkstra et al., 1959) to  
165 estimate the shortest paths between each pair of vertices on each individual cortical surface. For this computation we used the mid-cortical layer which is the average of the pial and white-gray matter surface. For computational and memory efficiency we only considered distances up to maximum of 50mm. Inter-vertex distances were then averaged across individuals and hemispheres. This resulted in a matrix that indicates the average cortical distance between

170 nearby brain locations for the atlas brain surface.

## 2.6. Distance Controlled Boundaries Coefficient (DCBC)

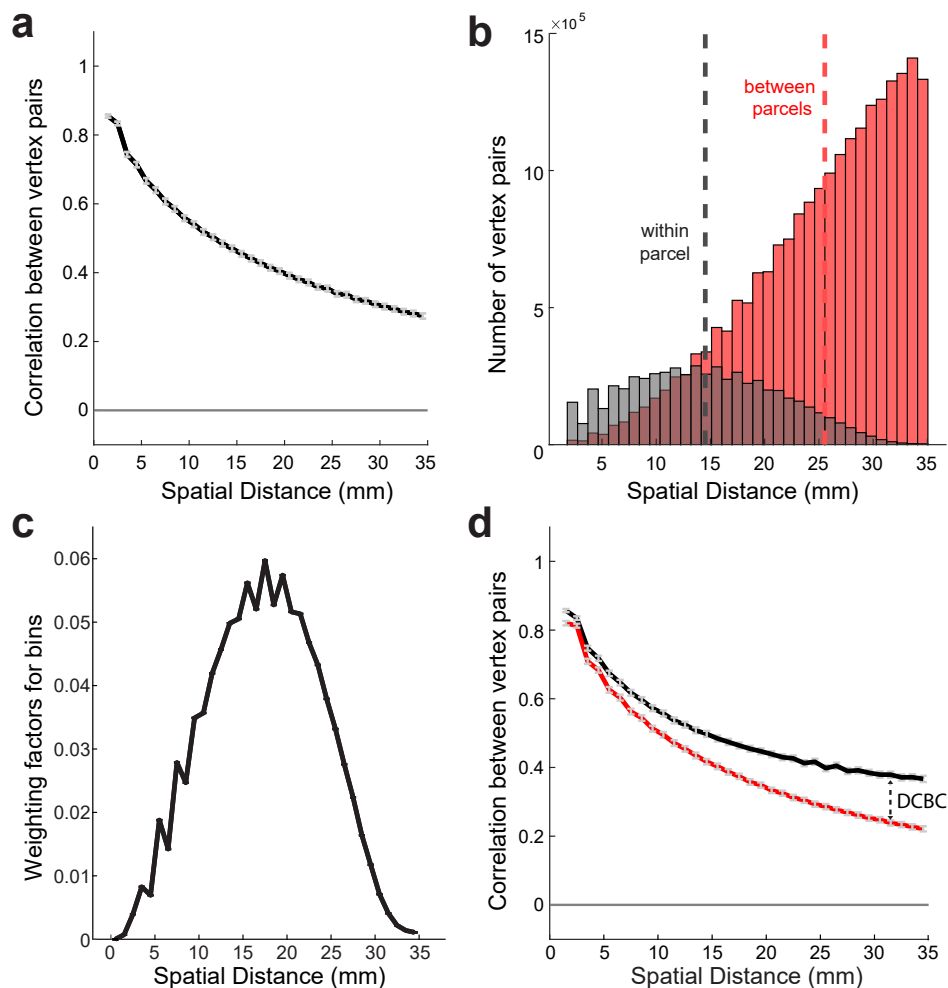

**Figure 1:** Distance controlled boundary coefficient. (a) Correlation between functional profiles (see methods) of pairs of surface vertices as a function of their spatial distance; (b) Histogram of the number of within and between vertex pairs as a function of spatial distance for a random Icosahedron 162 parcellation. (c) Weighting factor across different bins for the Icosahedron 162 parcellation and binning shown in b. (d) Correlation for within- (black) and between-region (red) node pairs as a function of the spatial distance. The DCBC is defined by the weighted average distance between the two curves.

### 2.6.1. The problem of spatial smoothness

The problem with global Homogeneity and Silhouette coefficients is that they do not take account that function tends to vary in a smooth fashion across the cortical surface. For instance, if we compute the correlation of vertex pairs across the cortex using task-evoked



functional profiles (King et al., 2019) for an individual participant, we can clearly see that the correlation falls off with the spatial distance between vertices (See Figure 1a). Note that this smoothness is not an artifact of the data processing; except for motion realignment and mapping onto the surface, no smoothing was applied to the data. Thus, the dependence on  
180 spatial distance reflects the intrinsic smoothness of functional specialization on the cortex.

For the Homogeneity coefficient this property favors parcellations with small parcels, as only close-by vertex pairs will be within the same parcel. Similarly, the spatial smoothness also biases the Silhouette coefficient, as the spatial distance for within-parcel pairs is on average smaller than that for between-parcel pairs. For example in random parcellation  
185 Icosahedron 162 (Fig. 1b), the average spatial distance of within-parcel pairs is 14.5 mm. Even if we limit the comparison to vertex pairs from spatially adjacent parcels, as is common practice in the evaluation of brain parcellations, the between-parcel pairs have a substantially larger average distance (25.5mm). This discrepancy results in a higher average correlation of functional profiles for within-parcel pairs compared to between-parcel pairs.

We therefore propose to only compare vertex pairs with a similar spatial distance. For  
190 this purpose, the DCBC method bins all voxels pairs according to their spatial distance, and then compares the correlation for within- and between-pairs within each bin. One important practical decision is the choice of bin size, a question that we address in the results section. For our neocortical data, a bin size of 1 mm appears to be adequate.

### 195 2.6.2. Averaging across bins

To obtain a single evaluation criterion for each parcellation, the results need to be integrated across spatial distances. This raises the question of what range of spatial distances to consider, and how to weight the distances within that range. A rational solution to this problem is to find the weighting that, for any given parcellation, provides us with the best  
200 estimate of the average difference between within- and between-parcel correlations, assuming that this differences is constant across distances. The variance of the estimate of the correlation difference ( $d_i$ ) for bin  $i$  can be approximated by assuming the independence of the different voxel pairs. In this case, the variance of the estimate depends on the number of within- ( $n_{b,I}$ ) and between-parcel vertex pairs ( $n_{w,i}$ ) in each spatial bin:

$$\text{var}(d_i) = \frac{1}{n_{b,i}} + \frac{1}{n_{w,i}} = \frac{n_{b,i} + n_{w,i}}{n_{b,i}n_{w,i}}$$

205 For averaging, we define a weight that is proportional to the precision (inverse of the variance) of each estimator:

$$w_i = \frac{n_{b,i}n_{w,i}}{n_{b,i} + n_{w,i}} / \sum_j \frac{n_{b,j}n_{w,j}}{n_{b,j} + n_{w,j}}$$

For example, figure 1c shows the weighting factor for each spatial bin of Icosahedron 162 random parcellation using a 1 mm bin width. The DCBC is then the weighted average of the correlation difference across bins.

## 210 2.7. Random Parcellations

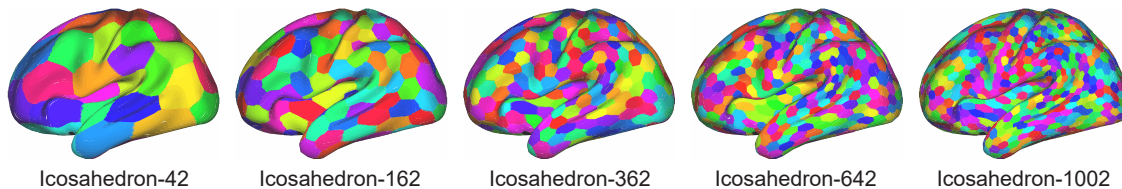

**Figure 2:** Random cortical parcellations with different number of parcels.

To evaluate the DCBC for parcellations that on average do not align with real functional boundaries, we generated a set of random parcellations. If our method successfully controls for the spatial smoothness of the functional profiles, the average DCBC for such random parcellations should be zero, i.e there should be no difference between within- and between-  
215 parcel correlations. To test this claim for parcellations at different spatial scales, we used a regular hexagonal parcellations of a sphere (Icosahedron) with 42, 162, 362, 642, and 1002 parcels. To generate random alignment of this parcellation with the data, we rotated each map randomly around the x, y, and z axis. We repeated this process 100 times to obtain 100 random parcellations for each spatial scale.

## 220 2.8. Random Functional Maps

Real data may have functional boundaries that are correlated across participants. As a consequence, some random parcellations will still by chance align with these boundaries

and yield systematically positive DCBC values; and other random parcellations will misalign with the real functional boundaries and yield systematically negative values. To test the DCBC on functional maps without a systematic boundary structure across participants, we also randomly generated 100 cortical functional maps with 34 task conditions. We drew independent normally distributed values for every condition and vertex for the fsLR-32k template (Van Essen et al., 2012), and then smoothed these maps on the cortical surface using `-metric-smooth` function provided by Connectome Workbench software (Marcus et al., 2011). The smoothing kernel was set to 12 centimeters, yielding a similar spatial autocorrelation function as in our real data.

### *2.9. Evaluation of commonly-used group parcellations*

We then evaluated a set of commonly used group parcellation of the human neocortex (Table 1). The majority of the parcellations considered here are based on resting-state functional connectivity (rs-FC) data. fMRI data is recorded at rest, and the covariance or correlations between the time series of different brain locations is submitted to a clustering or dimensionality reduction approach. Parcellations can also be based on task-evoked activation maps. For example Yeo et al. (2015) derived a parcellation from 10,449 experiment contrasts across 83 behavioural tasks. The anatomical parcellations considered here are based on the macro-anatomical folding structure of the human neocortex, following the major sulci and gyri of the human brain. Finally, we also considered 2 multi-modal parcellations, which combined rs-FC and anatomical criteria.

Within each of these categories, parcellations also differ in the approach used for generation. For instance, several parcellations were obtained based on a two-level approach, where subject-level parcellations are derived in a first step, and then integrated across subjects in a second step using clustering or majority voting. Other parcellations are directly derived by clustering group-averaged data (Arslan et al., 2018).

Because the DCBC evaluation considers only vertex pairs up to a specific spatial distance on the cortical surface, the evaluation is conducted separately for the left and right hemisphere. For many parcellations, the parcels are separated for the two hemispheres. For example, Gordon et al. (2016) used 161 and 172 distinct regions for the left and right hemi-

| Name              | Type          | Resolution  | Reference                                     | Link                                                                                                                                                                                                                            | Approach                                                                                                                                                                   |
|-------------------|---------------|-------------|-----------------------------------------------|---------------------------------------------------------------------------------------------------------------------------------------------------------------------------------------------------------------------------------|----------------------------------------------------------------------------------------------------------------------------------------------------------------------------|
| <i>Yeo</i>        | resting state | 7 and 17    | <a href="#">Yeo et al. (2011)</a>             | <a href="http://www.freesurfer.net/fswiki/CerebellumParcellation_Buckner2011">www.freesurfer.net/fswiki/CerebellumParcellation_Buckner2011</a>                                                                                  | cortical networks spanning both hemispheres; group-averaged rs-FC, spectral clustering                                                                                     |
| <i>Power</i>      | resting state | 130         | <a href="#">Power et al. (2011)</a>           | <a href="http://balsa.wustl.edu/study/show/WG33">balsa.wustl.edu/study/show/WG33</a>                                                                                                                                            | 65 regions per hemisphere, based on group-average rs-FC; mapping to surface space by <a href="#">Van Essen et al. (2017)</a> .                                             |
| <i>Schaefer</i>   | resting state | 100 to 1000 | <a href="#">Schaefer et al. (2018)</a>        | <a href="https://github.com/ThomasYeolab/CBIC/tree/master/stable_projects/brain_parcellation/Schaefer2018_LocalGlobal">github.com/ThomasYeolab/CBIC/tree/master/stable_projects/brain_parcellation/Schaefer2018_LocalGlobal</a> | group-averaged rs-FC; gradient-weighted Markov Random Field method; aligned to Yeo 7 and 17 networks                                                                       |
| <i>Gordon</i>     | resting state | 333         | <a href="#">Gordon et al. (2016)</a>          | <a href="http://sites.wustl.edu/petersenschlaggarlab/resources/">sites.wustl.edu/petersenschlaggarlab/resources/</a>                                                                                                            | group-averaged rs-FC; agglomerative-based clustering method                                                                                                                |
| <i>Baldassano</i> | resting state | 171         | <a href="#">Baldassano et al. (2015)</a>      | <a href="http://biomedia.doc.ic.ac.uk/brain-parcellation-survey/">biomedia.doc.ic.ac.uk/brain-parcellation-survey/</a>                                                                                                          | using HCP S500 group PCA output ( <a href="#">Smith et al., 2014</a> ) as connectivity profiles; Bayesian modelling                                                        |
| <i>Shen</i>       | resting state | 200         | <a href="#">Shen et al. (2013)</a>            | <a href="http://www.nitrc.org/frs/?group_id=51">www.nitrc.org/frs/?group_id=51</a>                                                                                                                                              | individual and group rs-FC data; spectral clustering; volume-surface mapping by <a href="#">Arslan et al. (2018)</a>                                                       |
| <i>ICA</i>        | resting state | 168 to 260  | <a href="#">Beckmann and Smith (2004)</a>     | <a href="http://biomedia.doc.ic.ac.uk/brain-parcellation-survey/">biomedia.doc.ic.ac.uk/brain-parcellation-survey/</a>                                                                                                          | based on HCP S500 group PCA output ( <a href="#">Smith et al., 2014</a> ); group-averaged parcellations obtained through group-ICA ( <a href="#">Arslan et al., 2018</a> ) |
| <i>Arslan</i>     | resting state | 50 to 483   | <a href="#">Arslan et al. (2018)</a>          | <a href="http://biomedia.doc.ic.ac.uk/brain-parcellation-survey/">biomedia.doc.ic.ac.uk/brain-parcellation-survey/</a>                                                                                                          | individual parcellations derived via spectral clustering; integrated into a group parcellation using second-level clustering                                               |
| <i>Yeo 2015</i>   | task-evoked   | 12          | <a href="#">Yeo et al. (2015)</a>             | <a href="http://surfer.nmr.mgh.harvard.edu/fswiki/Braimap0ntology_Yeo2015">surfer.nmr.mgh.harvard.edu/fswiki/Braimap0ntology_Yeo2015</a>                                                                                        | hierarchical Bayesian model applied to 10,449 task contrasts                                                                                                               |
| <i>AAL</i>        | anatomical    | 82          | <a href="#">Tzourio-Mazoyer et al. (2002)</a> | <a href="http://www.gin.cnr.fr/en/tools/aal/">www.gin.cnr.fr/en/tools/aal/</a>                                                                                                                                                  | commonly used brain atlas based on cortical folding; volume-based atlas mapped to surface                                                                                  |
| <i>Desikan</i>    | anatomical    | 70          | <a href="#">Desikan et al. (2006)</a>         | <a href="http://surfer.nmr.mgh.harvard.edu/fswiki/CorticalParcellation">surfer.nmr.mgh.harvard.edu/fswiki/CorticalParcellation</a>                                                                                              | individual parcellations based on cortical folding; group parcellation via majority-voting                                                                                 |
| <i>Destrieux</i>  | anatomical    | 150         | <a href="#">Fischl et al. (2004)</a>          | <a href="http://surfer.nmr.mgh.harvard.edu/fswiki/CorticalParcellation">surfer.nmr.mgh.harvard.edu/fswiki/CorticalParcellation</a>                                                                                              | individual parcellations based on cortical folding; group parcellation via majority-voting                                                                                 |
| <i>Glasser</i>    | multi-modal   | 360         | <a href="#">Glasser et al. (2016)</a>         | <a href="http://balsa.wustl.edu/study/show/RVWG">balsa.wustl.edu/study/show/RVWG</a>                                                                                                                                            | multi-modal group parcellation based on rs-FC and cytoarchitectonic information (Brodman areas and myelin content) from 210 HCP subjects                                   |
| <i>Fan</i>        | multi-modal   | 210         | <a href="#">Fan et al. (2016)</a>             | <a href="http://atlas.brainnetome.org/bnatlas.html">atlas.brainnetome.org/bnatlas.html</a>                                                                                                                                      | multi-modal parcellation; rs-FC and anatomical information from 40 HCP subjects; mapping to surface by <a href="#">Arslan et al. (2018)</a>                                |

**Table 1:** Commonly used group-level cortical parcellations. rs-FC: resting state functional connectivity (fMRI).

sphere respectively, totaling 333 regions. Other parcellations use bi-hemispheric parcels. As a consequence the 7 and 17 regions in [Yeo et al. \(2011\)](#), were effectively evaluated as 14 and 34 parcels.

255 Note that three group-level parcellations ([Fan et al., 2016](#), [Shen et al., 2013](#), [Tzourio-Mazoyer et al., 2002](#)) were only available in volume space. These parcellations were mapped to HCP standard fsLR-32k cortical surface using the volume-to-surface pipeline described in [Van Essen et al. \(2012\)](#) and [Arslan et al. \(2018\)](#). All parcellations in this study are available as a collection in fs-LR 32k surface space at ([Zhi and Diedrichsen, 2021](#)).

### 260 *2.10. Parcellation based on the evaluation data*

To estimate how well a group parcellation could theoretically subdivide the neocortex into functionally distinct regions, we derived a parcellation from the MDTB dataset. We estimated 12 cortical parcellations with 14 to 1000 parcels, using group-averaged MDTB functional profiles. This parcellation has an unfair advantage in that the individual used in  
265 the evaluation is also contained within the training set, providing an upper-bound estimate of the noise ceiling ([Nili et al., 2014](#)). To estimate a lower bound of the noise ceiling, we used a leave-one-out cross validation approach: We derived a group parcellation from the averaged data from 23 participants, and then evaluated it on the remaining subject. We then averaged the DCBC across the 24 different parcellations.

270 To derive the group parcellation we used spectral clustering. We first down-sampled the surface data from 32K vertices to 4002 vertices. Then we performed spectral clustering on the affinity matrix between the vertices of the down-sampled map. After clustering, we then restored the map to the original resolution of the surface. The lower resolution ensured that the resulting parcellations were spatially contiguous. We consider the MDTB group  
275 parcellation as a potential upper bound (see Results 3.4) of how well a group parcellation can perform on the MDTB data set.

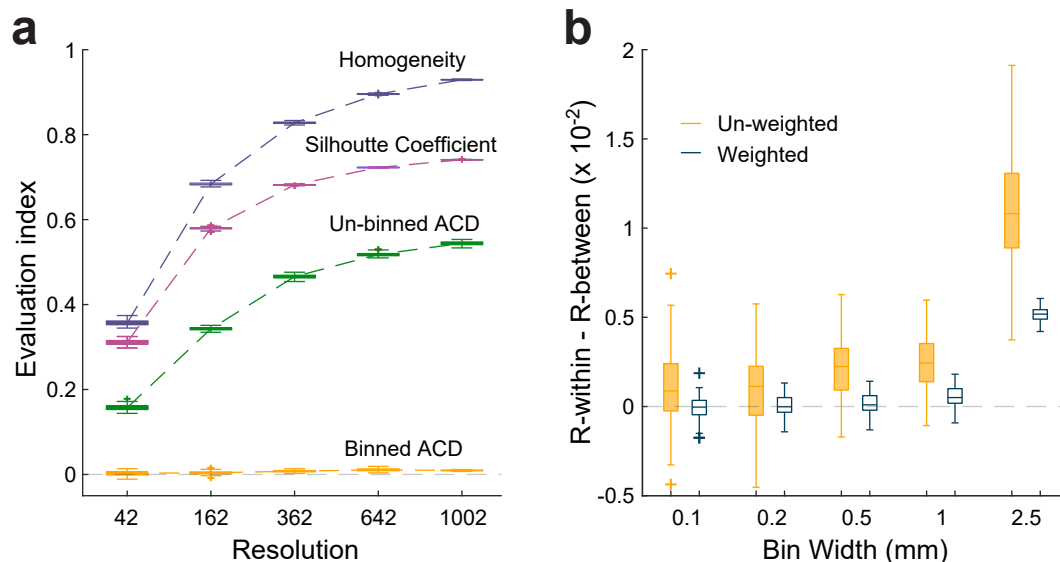

**Figure 3:** (a) Results of four evaluation methods for the random functional maps simulation in different resolutions: Homogeneity, Silhouette Coefficient, the un-binned average correlation difference (ACD) of within-parcel and between-parcel, and the binned (bin width = 2.5 mm) ACD of within-parcel and between-parcel; (b) The weighted and un-weighted DCBC evaluation results for 100 random functional maps in different bin widths of random parcellations Icosahedron 642.

### 3. Results

#### 3.1. Binning reduces the bias introduced by spatial smoothness

Existing evaluation methods for brain parcellations have the problem of being biased  
 280 by the natural smoothness of functional brain maps. To demonstrate this effect, we first  
 tested various evaluation methods using random functional maps and random parcellations  
 of different spatial scales. As can be seen in Figure 3a, both the Homogeneity and Silhouette  
 coefficient show highly significant positive values, even for these random maps. Furthermore,  
 the values for both methods increase when the parcellation increases in spatial resolution (i.e.  
 285 have more and smaller parcels). This makes direct comparisons of different parcellations of  
 different spatial scales difficult, and necessitates the use of randomisation analyses for each  
 parcellation to determine the baseline value expected by random chance (Arslan et al., 2018).

A similar problem can also be seen when using the difference between the correlations  
 within- and between pairs of nodes (un-binned average correlation difference, ACD). This  
 290 is caused by the tendency that vertices that are closer together show higher functional  
 correlations (Fig 1a), combined with the fact that within-parcel vertex pairs are on average

closer to each other than between-parcel pairs (Fig. 1b). To remove this bias, the DCBC calculation involves the binning of vertex pairs according to their spatial distance. We then calculate the difference between the average correlation between within- and between-  
295 parcel pairs within each spatial bin, thereby only comparing vertex pairs of matched spatial distance.

To ascertain that this approach provides an approximately unbiased and stable evaluation criterion, we first applied the suggested technique on the simulated functional data. As can be seen (Fig. 3a, binned ACD), even using a relatively coarse spatial binning of 2.5 mm,  
300 this approach nearly removes all bias caused by the spatial smoothness. For the finest parcellation, an Icosahedron with 1002 regions, the binned difference between correlations (0.009) was approximately 60 times lower than the mean of the difference calculated in each bin (0.544). This shows that the binning approach dramatically reduces the bias caused by spatial smoothness.

### 305 *3.2. Adaptive weighted averaging across bins reduces variance and bias*

After binning, the results need to be integrated across bins to arrive at a single evaluation criterion. This can be done by simply averaging the differences in correlation across bins. However, this approach leads to a summary measure with high variability (Fig. 3, b). This is caused by the fact all bins have equal influence on the average, even though some bins  
310 contain very few vertex pairs. This can be addressed by taking the number of within- and between-parcel pairs in each bin into account in an adaptive weighting scheme (see methods). Indeed, the standard deviation of the weighted DCBC is 2.8 times lower than for the unweighted version for 1 mm bins, and 8.1 times lower for the 2.5 mm bins. Furthermore, the weighted DCBC also shows smaller residual bias than the unweighted DCBC.

### 315 *3.3. Choosing an appropriate bin width*

An important practical issue in the DCBC calculation is to choose a specific bin width. This choice is subject to a fundamental trade-off. If the bin width is too wide, the DCBC may still be biased as a result of the spatial smoothness of the functional profiles. This is because within each bin, the average spatial distance for within-parcel pairs is still slightly smaller  
320 than for the between-parcel pairs, inducing a systematic difference between the correlations

within each spatial bin. Even though this bias is small, it can remain highly significant when tested across the 100 simulations presented in Fig. 3b for a bin width of 2.5mm. Choosing a smaller bin width reduces this bias. For bins of size 0.1 mm and 0.2 mm, the same 100 simulated data sets no longer show a significant difference against zero ( $p = 0.327$  and  $0.202$ ,  
325 respectively).

Choosing a very small bin width, however, also comes with some disadvantages. First, the computational cost of the DCBC calculation increases linearly with the number of bins. More importantly, if a very small bin is chosen, it can result in noisier DCBC estimate, as very few vertex pairs will fall within each bin. In the extreme case, there would either be  
330 no within- or between- vertex pair in a bin, such that the bin could not be used for the difference calculation. For neocortical data projected to the fsLR-32k template (Van Essen et al., 2012) a bin width of 1mm appears to offer a good balance between bias, accuracy and computational speed.

### 3.4. Evaluation of existing group parcellations

335 Using the MDTB data set (King et al., 2019) and the DCBC, we then evaluated 15 commonly used group-level cortical parcellations (Fig. 4a, Table 1). These parcellation relied either on anatomical criteria (cortical folding), task-evoked activation, or functional resting-state connectivity. A number of multi-modal parcellations (Glasser et al., 2016) relied on a combination of anatomical and functional features.

#### 340 3.4.1. Resting-state group parcellations predict functional boundaries

We first focused on the nine parcellations that are based solely on functional resting state data (Yeo et al., 2011, Power et al., 2011, Gordon et al., 2016, Arslan and Rueckert, 2015, Baldassano et al., 2015, Shen et al., 2013, Schaefer et al., 2018, Arslan et al., 2018). As can be seen in the Fig. 4b, most of these parcellations predicted the functional boundaries in the  
345 MDTB data set substantially better than chance. For example, the within- and between-parcel correlations for the Yeo 17 parcellation (Figure 1d) differed by approximately 0.1 across spatial bins, reflected in an average DCBC value for the Yeo 17 parcellation of 0.1020 (SE=0.0053) across the 24 subjects.



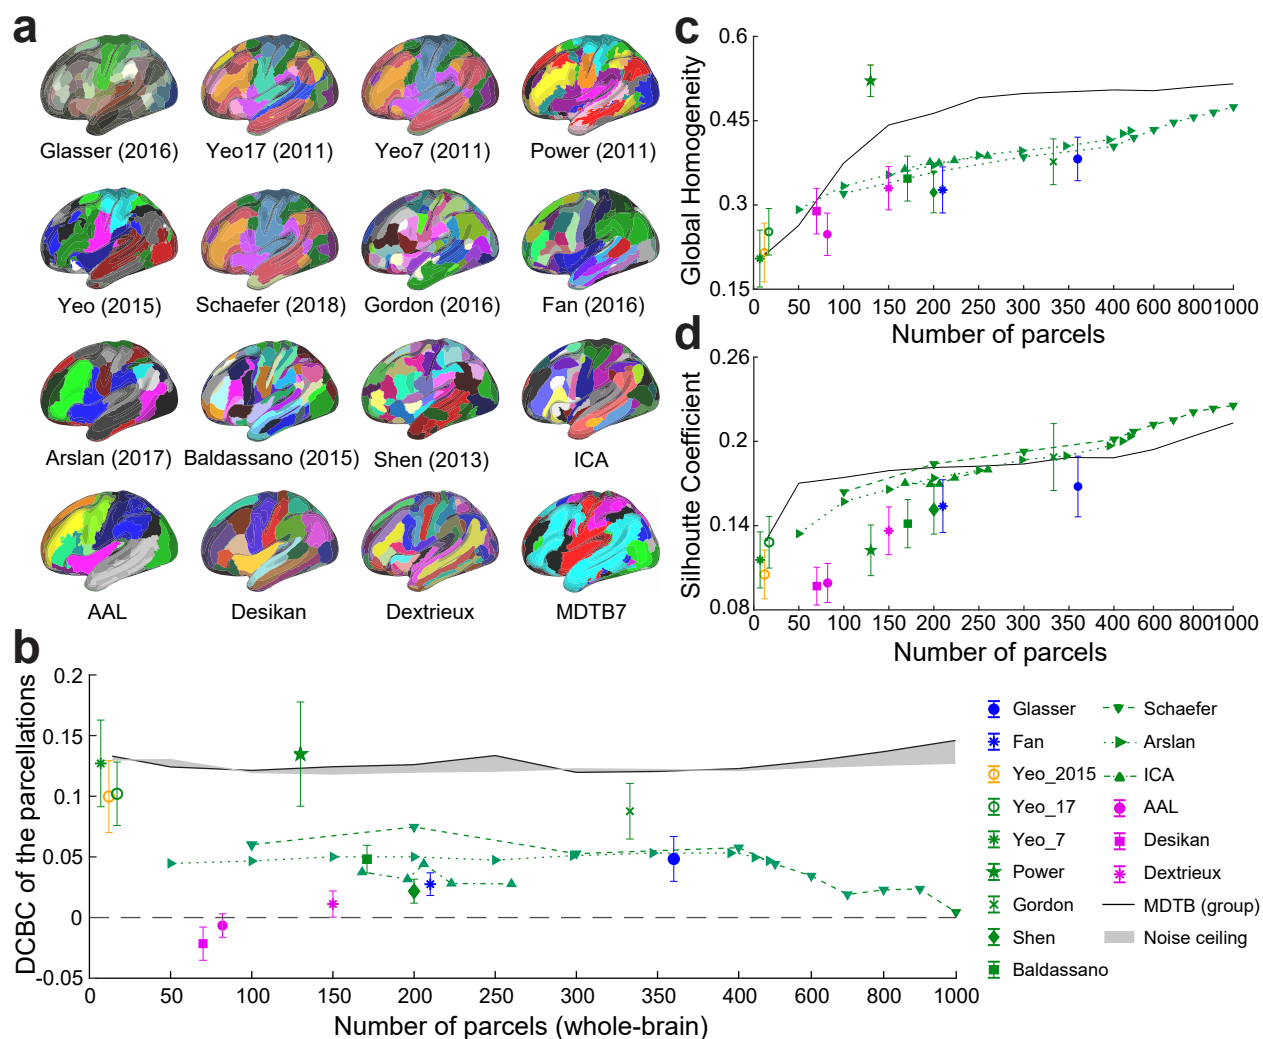

**Figure 4:** Evaluation of existing group parcellations. (a) The left hemisphere of 15 commonly used cortical parcellations plus the MDTB cortical parcellation with 7 regions. (b) The DCBC evaluation of the existing parcellations. The evaluation of the MDTB parcellations is indicated by the gray area (noise ceiling). The upper and lower bounds are the non-crossvalidated and cross-validated evaluations respectively. (c) The global homogeneity value for all parcellations; (d) The Silhouette Coefficient of the same parcellations. Error bars indicate SEM across the 24 evaluation subjects.

Other resting-state parcellations also showed clear differences between the within- and  
 350 between-parcel correlations, especially Power 2011 (DCBC=0.1347, SE=0.0088), Yeo 7 (DCBC=0.1271,  
 SE=0.0073), and Gordon 2016 (DCBC=0.0876, SE=0.0047). This finding shows that resting-  
 state group parcellations generally predict task-relevant functional boundaries significantly  
 better than chance (Tavor et al., 2016).

### 3.4.2. Comparison to parcellations derived from the evaluation data set

355 How well do these group-based resting-state parcellations predict task-based functional boundaries, relative to what would be possible? Given the inter-individual variability of boundaries, and the fact that even individual boundaries are not perfectly sharp, there is an upper limit to the highest achievable DCBC on our evaluation data set. To obtain an idea of this approximate “noise ceiling” (Nili et al., 2014), we derived a set of clustering  
360 solutions from the MDTB data itself (see methods, Fig.4a), spanning the range from 14 to 1000 parcels.

To obtain a range of estimates of this noise ceiling, we derived and evaluated the parcellations in two ways, We either derived and evaluated on all 24 participants, or we derived the parcellation on 23 of the participants, and evaluated it on the remaining, left-out participant.  
365 The gap between these two performance curves indicates how much of the performance advantage of the MDTB parcellation is due to the over-fitting to the particular set of subjects.

As expected, the MDTB-based parcellations (gray area in Fig.4b) generally outperformed other group parcellations on this data set. Nonetheless, some existing resting-state parcellations showed performance very close or even slightly higher than the MDTB parcellation  
370 (Yeo et al., 2011, Power et al., 2011).

### 3.4.3. Anatomical parcellations do not predict functional boundaries

We then evaluated 3 commonly used anatomical group parcellations of the human neocortex: The Desikan parcellations (Desikan et al., 2006) , the Dextrieux atlas (Fischl et al., 2004), and the Automated Anatomical Labelling (AAL) atlas (Tzourio-Mazoyer et al., 2002).  
375 The averaged correlation between any vertex pairs within a predefined anatomical parcel was not much greater than the correlation between vertex pairs across anatomical boundaries (Fig.4b), resulting in very low DCBC values (Dextrieux: DCBC=-0.0185, SE=0.004; AAL: DCBC=-0.0077, SE=0.002). The Desikan parcellation (DCBC=-0.0581, SE=0.003) even showed significantly negative DCBC values across the 24 subjects. This parcellation, based  
380 on the macroanatomical folding structure of the neocortex, therefore defines boundaries that are systematically misaligned with the functional subdivisions in task-evoked activity profiles.

#### 3.4.4. Multi-modal parcellations do not perform better than resting-state parcellations

We also applied DCBC evaluation to two multi-modal parcellations (Glasser et al., 2016, 385 Fan et al., 2016) to determine whether combining anatomical and functional data is superior to unimodal parcellations. The Glasser parcellation had a slightly higher DCBC score (DCBC=0.0483, SE=0.0038) as compared to the Fan parcellation (DCBC=0.0275, SE=0.0019). However, both were lower than the average DCBC across the resting-state parcellations (0.0753). It therefore appears that the combination of multiple modalities 390 does not systematically lead to a better prediction of task-relevant function boundaries than parcellations that are derived on resting-state data alone.

#### 3.4.5. Comparison across different spatial resolutions

For simulated random functional maps, we have shown that the expected value of the DCBC is zero, no matter how fine the parcellation (Fig.3b). In contrast, the value of the 395 global Homogeneity and Silhouette coefficient increases for finer parcellations even for random maps (Fig.3a).

This bias can also be observed for real parcellations. The value of the global Homogeneity (Fig.4c) and Silhouette coefficient (Fig. 4d) clearly increases for finer parcellations, whereas there is no strong relationship between the DCBC and the number of parcels (Fig. 4b).

400 In this context, the set of Schaefer 2018 parcellations (Schaefer et al., 2018) is especially interesting, as it provides a nested set of subdivisions with an increasing number of parcels, all aligned with Yeo 7 networks. To statistically evaluate the change in evaluation metric with parcel size, we conducted a repeated-measures analysis of variance (ANOVA) across the 10 Schaefer 2018 parcellations, ranging from 100 to 1000 parcels. As expected, both the Homogeneity ( $F_{9,207} = 667.6, p = 1.11 \times 10^{-147}$ ) and Silhouette coefficient 405 ( $F_{9,207} = 1483.2, p = 1.05 \times 10^{-183}$ ) clearly showed significant increases for an increasing number of parcels. Given that such increases were also found for random functional maps and parcellations, it is not clear whether the finer parcellations identified functional boundaries better, the same, or worse than coarser parcellations.

410 In contrast, the unbiased DCBC shows that the Schaefer parcellation reaches the best performance around 200 parcels, and then slowly declines for finer parcellations (Fig.4b).

The ANOVA showed a significant change with number of parcels ( $F_{9,207} = 193.70, p = 1.07 \times 10^{-95}$ ). Indeed, for the finest parcellation (1000 parcels), performance did not differ significantly from chance ( $t_{23} = 2.67, p = 0.0137$ ). One possible reason for this is that when  
415 defining more than 200 functional parcels, the defined boundaries do not consistently predict discontinuities in the functional organisation at the group level anymore.

In summary, the application of the novel DCBC criterion to known cortical parcellations allowed for the following conclusions: (1) anatomical parcellations based on cortical folding do not align with functional boundaries in the neocortex ; (2) resting-state parcellations pre-  
420 dict task-relevant functional boundaries, outperforming other types of cortical parcellations; (3) multi-modal parcellations did not improve performance as compared to pure resting-state parcellations.

### 3.5. *Open-source toolbox/data support evaluation*

The code for DCBC evaluation is published as an open-source toolbox written in Python  
425 at (Zhi and Diedrichsen, 2021). The package also contains the pre-processed contrast maps for all task conditions of the MDTB data set (n=24 subjects), sampled to the standard fsLR-32k template.

## 4. Discussion

In this study, we introduce a novel evaluation criterion for brain parcellations, the Dis-  
430 tance Controlled Boundary Coefficient (DCBC). The method takes into account the spatial smoothness of the data by controlling the distance of the vertex pairs when comparing within- and between-parcel correlations. We used an earlier form of this approach to evaluate cerebellar parcellations (King et al., 2019). Here, we further improve the approach by adaptively weighting over the spatial distance bins, resulting in a global measure with low bias and  
435 variance. Our evaluation on simulated smooth data shows that the new criterion overcomes the size- and shape-dependent bias of other homogeneity-type evaluation criteria (Craddock et al., 2012, Rousseeuw, 1987). The advantage of the DCBC is twofold: 1) it enables a direct comparison between group brain parcellations that have different spatial resolutions, and 2)

it provides a direct test of how well a parcellation subdivides the brain into homogeneous  
440 regions than expected by chance.

We used the DCBC to evaluate a range of existing cortical surface-based parcellations. We found that the parcellations derived from resting-state fMRI data largely succeed in predicting task-evoked activity boundaries, replicating earlier work (Tavor et al., 2016, King et al., 2019). These results demonstrate again the practical utility of resting state data in  
445 identifying brain networks that work together during active task performance. Even though the correlation structure across the cortex does clearly change in a task-dependent fashion (Hasson et al., 2009, Salehi et al., 2020a,b), our results emphasize the existence of a basic scaffold that determines functional specialization across a wide range of tasks, as well as during rest.

In contrast, anatomical parcellations (Desikan et al., 2006, Fischl et al., 2004, Tzourio-Mazoyer et al., 2002) did not perform better than chance. All three selected anatomical parcellations showed an approximately zero, or even significantly negative DCBC score on the MDTB dataset. This finding corroborates previous work that shows a misalignment between macroanatomical folding structure and functional boundaries in the neocortex (Arslan  
455 et al., 2018) and the cerebellum (King et al., 2019). An inspection of the differences between functional and anatomical parcellations (Fig. 4a) suggest an explanation of why this may be the case. Cortical motor areas, for example, are subdivided in all anatomical parcellations along the central sulcus, which separates the primary motor cortex (M1) from primary somatosensory cortex (S1). In this case, the macro-anatomical folding roughly aligns with  
460 the cyto-architectonic boundaries between the two regions (Brodmann, 1909, Amunts and Zilles, 2015, Fischl et al., 2008). In contrast, functional parcellations typically separate the motor regions along a ventral-dorsal axis, that is, into foot, hand and mouth regions. Within each body zone, these parcellations leave M1, S1, and premotor regions in the same parcel, likely reflecting the high functional correlations between regions responsible for the control  
465 of a body part. Similar observations can be made in the visual system - with functional parcellations separating areas associated with foveal and peripheral vision, rather than subdividing known cytoarchitectonic regions (V1, V2, V3). This anti-correlation of functional and anatomical boundaries partly explains why the Desikan atlas showed a significantly

negative DCBC.

470 It is therefore also unsurprising that multi-modal parcellations that combine functional and anatomical criteria did not outperform the pure resting-state parcellations. For example, [Glasser et al. \(2016\)](#) used resting-state connectivity, intra-cortical myelin signal, and cortical folding, thereby improving alignment with cytoarchitectonically defined areas. The inclusion of anatomical information likely also led to the division of functionally correlated brain  
475 regions. This does not imply that cytoarchitectonic parcellations of the neocortex are of lesser value. Instead, our finding simply illustrates that the goal of isolating anatomically consistently organised regions is unrelated to, and in some cases conflicts with, the goal of defining functionally uniform brain regions.

Therefore, the evaluation results in our study would have looked different had we used  
480 anatomical data rather than task-evoked activity profiles as an evaluation data set. It is worth stressing, however, that the DCBC as a method to control for the influence of spatial smoothness can be used with any suitable data set. For instance, anatomical data, such as myelin measures ([Tozer et al., 2005](#)) or anatomical connectivity fingerprints derived from diffusion data ([Behrens et al., 2003](#), [Johansen-Berg et al., 2004](#)) can be used to evaluate how  
485 well parcellations isolate anatomically homogeneous regions. Functional resting-state data would provide another basis for evaluation ([Arslan et al., 2018](#), [Eickhoff et al., 2018](#)). In this case, the functional task profiles used here would simply be replaced by the resting-state time series. Given that these data types exhibit a smooth organisation across the brain, the automatic bias correction and optimal integration approach generalizes to these applications.

490 In the current study we focused solely on task-evoked fMRI data as an evaluation target. This was motivated by the fact that a common goal of brain parcellations is to define regions with a homogeneous response across a wide range of tasks and mental states. From this perspective, unless we want to explicitly study the brain at rest, parcellations based on resting-state fMRI data are only interesting insofar as they predict which brain regions work  
495 together during activity ([Tavor et al., 2016](#)) - and should therefore be evaluated that way.

A possible extension of the current work is to develop a parcellation algorithm that explicitly optimizes the DCBC. Given the nature of the DCBC, such an algorithm would have to be a local, rather than a global parcellation algorithm ([Schaefer et al., 2018](#)), such as

a region-growing algorithm proposed in [Gordon et al. \(2016\)](#) or [Salehi et al. \(2020a\)](#). Such  
500 an algorithm would very likely improve the DCBC beyond what was achieved by spectral  
clustering, which does not consider the spatial arrangement of the vertices. In the current  
paper, rather than proposing a novel group parcellation, our main aim was to estimate an  
“upper bound” of how well a group parcellation could perform on our data set. While  
cross-validated across subjects, the parcellation is still overfit to the specific task set.

505 Even more substantial improvement in the quality of the parcellations can be expected  
when moving from a group to an individual parcellation. Recent results have shown that  
the inter-individual differences in the exact spatial location of functional boundaries are  
substantial ([Salehi et al., 2020b](#), [King et al., 2019](#)). Of course, individual parcellations can  
suffer from having too little individual data to reliably establish the parcellation. Optimal  
510 ways of fusing group and individual-level data ([Buckner et al., 2013](#)), which also makes  
parcels comparable across subjects ([Salehi et al., 2020a](#)) clearly provides a promising future  
addition to the neuroimaging toolkit. In these efforts, the DCBC can provide a bias-free  
and reliable evaluation criterion that can be calculated without computationally expensive  
simulation studies.

515 When developing, using, and evaluating brain parcellations, it is of course important to  
consider the fundamental issues in choosing this form of brain representation ([Bijsterbosch  
et al., 2020](#)). It remains an open question to what degree segmenting the brain into discrete  
regions with hard boundaries ([Van Essen and Glasser, 2018](#)) is a useful description at all,  
or to what degree this functional organisation is better explained through a set of smooth  
520 gradients ([Tononi et al., 1994](#), [Dohmatob et al., 2021](#), [Huntenburg et al., 2018](#), [Guell et al.,  
2018](#)). The DCBC evaluation presented here clearly provides an important data point in this  
debate. If brain functions only varied in smooth gradients across the cortical surface, the  
DCBC should not be systematically above zero, at least not when evaluated on a novel set of  
tasks. However, most resting-state parcellations identified boundaries that also aligned with  
525 more rapid changes in the active functional response. Thus, as for the human cerebellum  
([King et al., 2019](#)), this demonstrates the existence of task-invariant functional boundaries  
on the cortical surface. On the other hand, not all boundaries are equally strong, and not  
all boundaries are equally stable across tasks. The ability of DCBC to evaluate individual

boundaries, as done in [King et al. \(2019\)](#), therefore provides an important tool to evaluate  
530 both functional segregation, as well as continuous functional integration ([Eickhoff et al.,  
2018](#)) in a region-specific way.

A Python-based software toolbox for the evaluation of surface-based parcellations on the MDTB activity maps is made publicly available at ([Zhi and Diedrichsen, 2021](#)). The toolbox is also designed to allow users to evaluate parcellations on other types of data. We hope that the new evaluation criterion will support and facilitate researchers in understanding the functional compartmentalization of the human brain.



## References

- K. Amunts and K. Zilles. Architectonic mapping of the human brain beyond brodmann. *Neuron*, 88(6):1086–1107, 2015.
- 535 S. Arslan and D. Rueckert. Multi-level parcellation of the cerebral cortex using resting-state fmri. In *International Conference on Medical Image Computing and Computer-assisted Intervention*, pages 47–54. Springer, 2015.
- S. Arslan, S. I. Ktena, A. Makropoulos, E. C. Robinson, D. Rueckert, and S. Parisot. Human brain mapping: A systematic comparison of parcellation methods for the human cerebral  
540 cortex. *Neuroimage*, 170:5–30, 2018.
- C. Baldassano, D. M. Beck, and L. Fei-Fei. Parcellating connectivity in spatial maps. *PeerJ*, 3:e784, 2015.
- C. F. Beckmann and S. M. Smith. Probabilistic independent component analysis for functional magnetic resonance imaging. *IEEE transactions on medical imaging*, 23(2):137–152,  
545 2004.
- T. E. Behrens, H. Johansen-Berg, M. Woolrich, S. Smith, C. Wheeler-Kingshott, P. Boulby, G. Barker, E. Sillery, K. Sheehan, O. Ciccarelli, et al. Non-invasive mapping of connections between human thalamus and cortex using diffusion imaging. *Nature neuroscience*, 6(7):750–757, 2003.
- 550 P. Bellec, P. Rosa-Neto, O. C. Lyttelton, H. Benali, and A. C. Evans. Multi-level bootstrap analysis of stable clusters in resting-state fmri. *Neuroimage*, 51(3):1126–1139, 2010.
- J. Bijsterbosch, S. J. Harrison, S. Jbabdi, M. Woolrich, C. Beckmann, S. Smith, and E. P. Duff. Challenges and future directions for representations of functional brain organization. 2020. ISSN 15461726. doi: 10.1038/s41593-020-00726-z.
- 555 K. Brodmann. *Vergleichende Lokalisationslehre der Grosshirnrinde in ihren Prinzipien dargestellt auf Grund des Zellenbaues*. Barth, 1909.
- R. L. Buckner, F. M. Krienen, and B. T. Yeo. Opportunities and limitations of intrinsic functional connectivity mri. *Nature neuroscience*, 16(7):832–837, 2013.
- R. C. Craddock, G. A. James, P. E. Holtzheimer III, X. P. Hu, and H. S. Mayberg. A whole brain fmri atlas generated via spatially constrained spectral clustering. *Human brain mapping*, 33(8):1914–1928, 2012.
- 560 R. S. Desikan, F. Ségonne, B. Fischl, B. T. Quinn, B. C. Dickerson, D. Blacker, R. L. Buckner, A. M. Dale, R. P. Maguire, B. T. Hyman, et al. An automated labeling system for subdividing the human cerebral cortex on mri scans into gyral based regions of interest. *Neuroimage*, 31(3):968–980, 2006.
- 565 E. W. Dijkstra et al. A note on two problems in connexion with graphs. *Numerische mathematik*, 1(1):269–271, 1959.

- E. Dohmatob, H. Richard, A. L. Pinho, and B. Thirion. Brain topography beyond parcellations: Local gradients of functional maps. *NeuroImage*, 2021.
- 570 S. B. Eickhoff, B. T. Yeo, and S. Genon. Imaging-based parcellations of the human brain. *Nature Reviews Neuroscience*, 19(11):672–686, 2018.
- L. Fan, H. Li, J. Zhuo, Y. Zhang, J. Wang, L. Chen, Z. Yang, C. Chu, S. Xie, A. R. Laird, et al. The human brainnetome atlas: a new brain atlas based on connectional architecture. *Cerebral cortex*, 26(8):3508–3526, 2016.
- 575 D. J. Felleman and D. C. Van Essen. Distributed hierarchical processing in the primate cerebral cortex. In *Cereb cortex*. Citeseer, 1991.
- B. Fischl. Freesurfer. *Neuroimage*, 62(2):774–781, 2012.
- B. Fischl, A. Van Der Kouwe, C. Destrieux, E. Halgren, F. Ségonne, D. H. Salat, E. Busa, L. J. Seidman, J. Goldstein, D. Kennedy, et al. Automatically parcellating the human  
580 cerebral cortex. *Cerebral cortex*, 14(1):11–22, 2004.
- B. Fischl, N. Rajendran, E. Busa, J. Augustinack, O. Hinds, B. T. Yeo, H. Mohlberg, K. Amunts, and K. Zilles. Cortical folding patterns and predicting cytoarchitecture. *Cereb Cortex*, 18(8):1973–1980, 2008.
- M. F. Glasser and D. C. Van Essen. Mapping human cortical areas in vivo based on myelin  
585 content as revealed by t1-and t2-weighted mri. *Journal of Neuroscience*, 31(32):11597–11616, 2011.
- M. F. Glasser, T. S. Coalson, E. C. Robinson, C. D. Hacker, J. Harwell, E. Yacoub, K. Ugurbil, J. Andersson, C. F. Beckmann, M. Jenkinson, et al. A multi-modal parcellation of human cerebral cortex. *Nature*, 536(7615):171–178, 2016.
- 590 E. M. Gordon, T. O. Laumann, B. Adeyemo, J. F. Huckins, W. M. Kelley, and S. E. Petersen. Generation and Evaluation of a Cortical Area Parcellation from Resting-State Correlations. *Cerebral Cortex*, 2016.
- X. Guell, J. D. Schmahmann, J. D. Gabrieli, and S. S. Ghosh. Functional gradients of the cerebellum. *eLife*, 7, aug 2018.
- 595 U. Hasson, H. C. Nusbaum, and S. L. Small. Task-dependent organization of brain regions active during rest. *Proceedings of the National Academy of Sciences of the United States of America*, 106(26):10841–10846, jun 2009.
- J. M. Huntenburg, P.-L. Bazin, and D. S. Margulies. Large-scale gradients in human cortical organization. *Trends in cognitive sciences*, 22(1):21–31, 2018.
- 600 H. Johansen-Berg, T. Behrens, M. Robson, I. Drobnjak, M. Rushworth, J. Brady, S. Smith, D. Higham, and P. Matthews. Changes in connectivity profiles define functionally distinct regions in human medial frontal cortex. *Proceedings of the National Academy of Sciences*, 101(36):13335–13340, 2004.

- M. King, C. R. Hernandez-Castillo, R. A. Poldrack, R. B. Ivry, and J. Diedrichsen. Functional  
605 boundaries in the human cerebellum revealed by a multi-domain task battery. *Nature neuroscience*, 22(8):1371–1378, 2019.
- D. Marcus, J. Harwell, T. Olsen, M. Hodge, M. Glasser, F. Prior, M. Jenkinson, T. Laumann, S. Curtiss, and D. Van Essen. Informatics and data mining tools and strategies for the human connectome project. *Frontiers in neuroinformatics*, 5:4, 2011.
- 610 H. Nili, C. Wingfield, A. Walther, L. Su, W. Marslen-Wilson, and N. Kriegeskorte. A toolbox for representational similarity analysis. *PLoS Comput Biol*, 10(4):e1003553, 2014.
- J. D. Power, A. L. Cohen, S. M. Nelson, G. S. Wig, K. A. Barnes, J. A. Church, A. C. Vogel, T. O. Laumann, F. M. Miezin, B. L. Schlaggar, et al. Functional network organization of the human brain. *Neuron*, 72(4):665–678, 2011.
- 615 P. J. Rousseeuw. Silhouettes: a graphical aid to the interpretation and validation of cluster analysis. *Journal of computational and applied mathematics*, 20:53–65, 1987.
- M. Salehi, A. S. Greene, A. Karbasi, X. Shen, D. Scheinost, and R. T. Constable. There is no single functional atlas even for a single individual: Functional parcel definitions change with task. *NeuroImage*, 208:116366, mar 2020a.
- 620 M. Salehi, A. Karbasi, D. S. Barron, D. Scheinost, and R. T. Constable. Individualized functional networks reconfigure with cognitive state. *NeuroImage*, 206:116233, feb 2020b.
- A. Schaefer, R. Kong, E. M. Gordon, T. O. Laumann, X.-N. Zuo, A. J. Holmes, S. B. Eickhoff, and B. T. Yeo. Local-global parcellation of the human cerebral cortex from intrinsic functional connectivity mri. *Cerebral cortex*, 28(9):3095–3114, 2018.
- 625 X. Shen, F. Tokoglu, X. Papademetris, and R. T. Constable. Groupwise whole-brain parcellation from resting-state fmri data for network node identification. *Neuroimage*, 82:403–415, 2013.
- S. M. Smith, A. Hyvärinen, G. Varoquaux, K. L. Miller, and C. F. Beckmann. Group-pca for very large fmri datasets. *Neuroimage*, 101:738–749, 2014.
- 630 O. Sporns. The human connectome: a complex network. *Annals of the New York Academy of Sciences*, 1224(1):109–125, 2011.
- J. Talairach. 3-dimensional proportional system; an approach to cerebral imaging. co-planar stereotaxic atlas of the human brain. *Thieme*, pages 1–122, 1988.
- I. Tavor, O. Parker Jones, R. B. Mars, S. M. Smith, T. E. Behrens, and S. Jbabdi. Task-free  
635 MRI predicts individual differences in brain activity during task performance. *Science*, 352(6282):216–220, 2016.
- G. Tononi, O. Sporns, and G. M. Edelman. A measure for brain complexity: relating functional segregation and integration in the nervous system. *Proceedings of the National Academy of Sciences*, 91(11):5033–5037, 1994.

- 640 D. J. Tozer, G. Davies, D. Altmann, D. Miller, and P. Tofts. Correlation of apparent myelin measures obtained in multiple sclerosis patients and controls from magnetization transfer and multicompartamental t2 analysis. *Magnetic Resonance in Medicine: An Official Journal of the International Society for Magnetic Resonance in Medicine*, 53(6):1415–1422, 2005.
- 645 N. Tzourio-Mazoyer, B. Landeau, D. Papathanassiou, F. Crivello, O. Etard, N. Delcroix, B. Mazoyer, and M. Joliot. Automated anatomical labeling of activations in spm using a macroscopic anatomical parcellation of the mni mri single-subject brain. *Neuroimage*, 15(1):273–289, 2002.
- D. C. Van Essen and M. F. Glasser. Parcellating Cerebral Cortex: How Invasive Animal  
650 Studies Inform Noninvasive Mapmaking in Humans. 2018. ISSN 10974199. doi: 10.1016/j.neuron.2018.07.002.
- D. C. Van Essen, M. F. Glasser, D. L. Dierker, J. Harwell, and T. Coalson. Parcellations and hemispheric asymmetries of human cerebral cortex analyzed on surface-based atlases. *Cerebral cortex*, 22(10):2241–2262, 2012.
- 655 D. C. Van Essen, J. Smith, M. F. Glasser, J. Elam, C. J. Donahue, D. L. Dierker, E. K. Reid, T. Coalson, and J. Harwell. The brain analysis library of spatial maps and atlases (balsa) database. *Neuroimage*, 144:270–274, 2017.
- B. T. Yeo, F. M. Krienen, J. Sepulcre, M. R. Sabuncu, D. Lashkari, M. Hollinshead, J. L. Roffman, J. W. Smoller, L. Zöllei, J. R. Polimeni, et al. The organization of the human  
660 cerebral cortex estimated by intrinsic functional connectivity. *Journal of neurophysiology*, 2011.
- B. T. Yeo, F. M. Krienen, S. B. Eickhoff, S. N. Yaakub, P. T. Fox, R. L. Buckner, C. L. Asplund, and M. W. Chee. Functional specialization and flexibility in human association cortex. *Cerebral cortex*, 25(10):3654–3672, 2015.
- 665 D. Zhi and J. Diedrichsen. DCBC toolbox: A Python toolbox for brain parcellation evaluation, May 2021. URL <https://github.com/DiedrichsenLab/DCBC/tree/v1.0.0>.
- K. Zilles, N. Palomero-Gallagher, C. Grefkes, F. Scheperjans, C. Boy, K. Amunts, and A. Schleicher. Architectonics of the human cerebral cortex and transmitter receptor fingerprints: reconciling functional neuroanatomy and neurochemistry. *European Neuropsychopharmacology*, 12(6):587–599, 2002.  
670
